# Supplementary material for: The Newly Identified Trichoderma harzianum Partitivirus (ThPV2) Does Not Diminish Spore Production and Biocontrol Activity of Its Host
Source: MDPI journal article supplement (doi:10.3390/v14071532), 2022-07-14
Supplement: s1 [file s1]

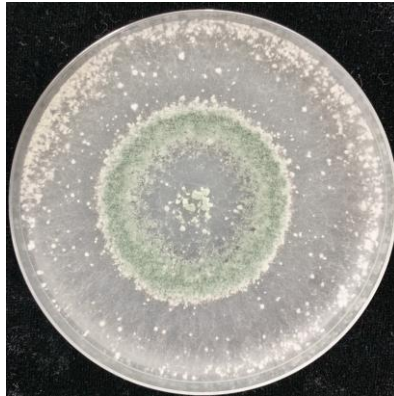

**Figure S1.** Colony morphology of *T. harzianum* strain T673 on PDA medium.

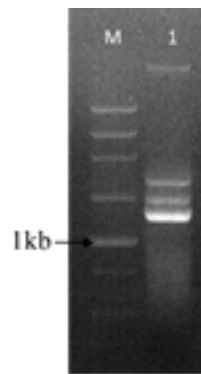

A.

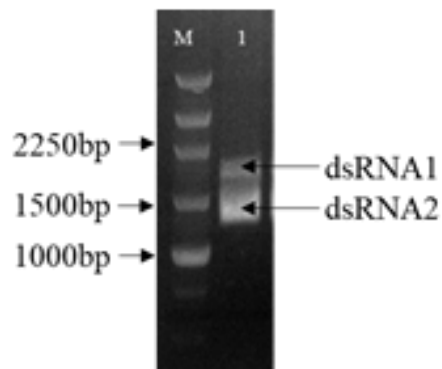

B.

**Figure S2.** The extraction of dsRNA from strain T673 and identification by enzyme digestion. A. DsRNA extracted from strain T673, M: DNA Marker (250 bp DNA Ladder); Line 1: DsRNAs detected from *T. harzianum* strain T673. B. DsRNA from T673 treated with by S1 nuclease and DNase I; M: DNA Marker (250 bp DNA Ladder); Line 1: dsRNA digested by S1 nuclease and DNase I.

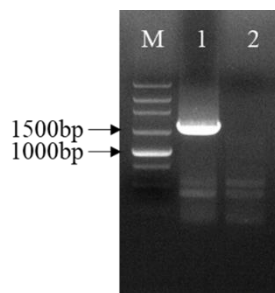

A.

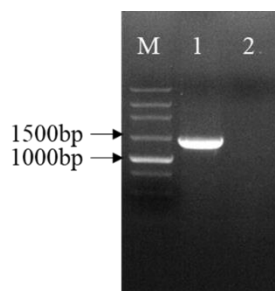

B.

**Figure S3.** Presence and absence of ThPV2 in strains T673 (before elimination) and T673-F (after elimination) respectively. A. Detection of ThPV2 dsRNA1 in strains T673 and T673-F by RT-PCR. M: DNA Marker (250 bp DNA Ladder); Line 1: Results from strain T673; Line 2: Results from strain T673-F; B. Detection of ThPV2- dsRNA2 in strains T673 and T673-F by RT-PCR. M: DNA Marker (250 bp DNA Ladder); Line 1: Results from strain T673; Line 2: RT-PCR from strain T673-F.

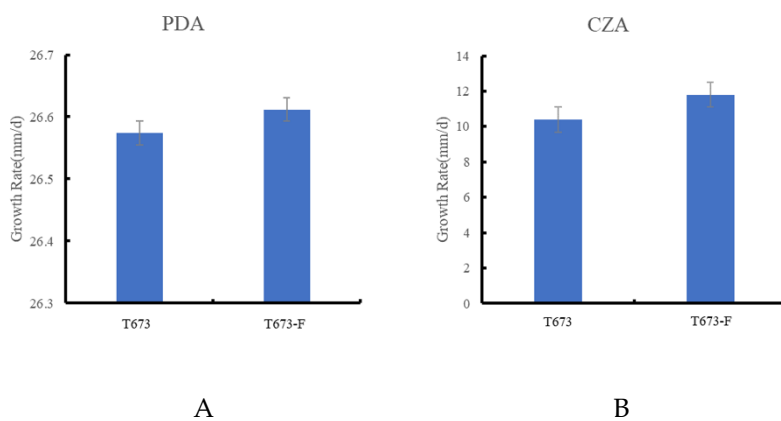

**Figure S4.** Growth rates of strains T673 and T673-F on (A) PDA and (B) CZA mediums.

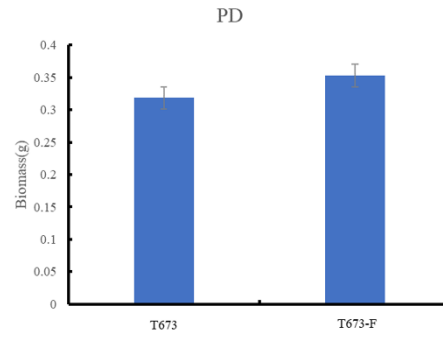

**Figure S5.** Biomass comparison of strains T673 and T673-F on PD medium.

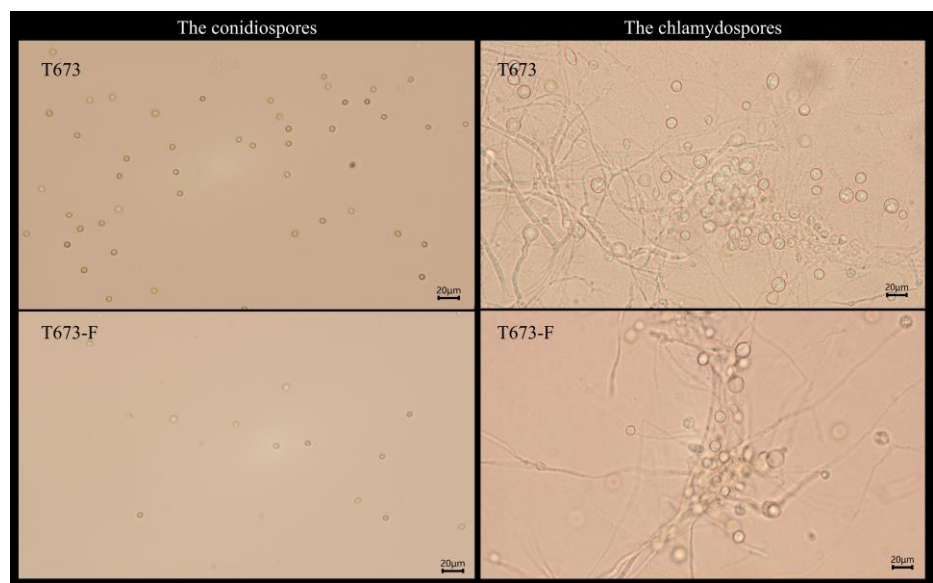

**A**

**B**

**Figure S6.** Conidiospore and chlamydospore of T673 and T673-F. A: Conidiospore of T673 and T673-F produced in PDA medium; B: Chlamydospore of T673 and T673-F produced in chlamydospore induction medium.

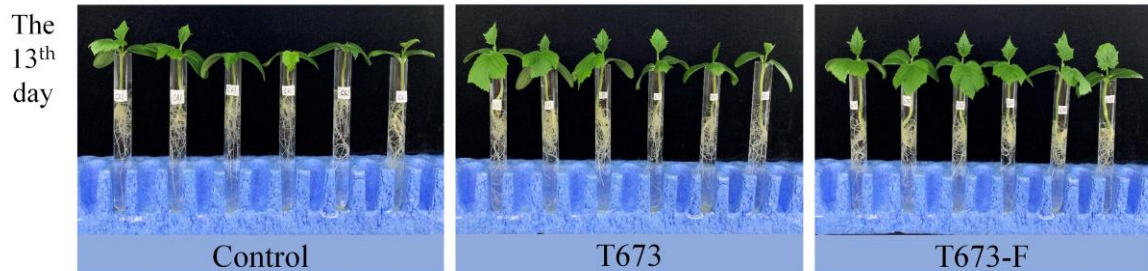

**A**

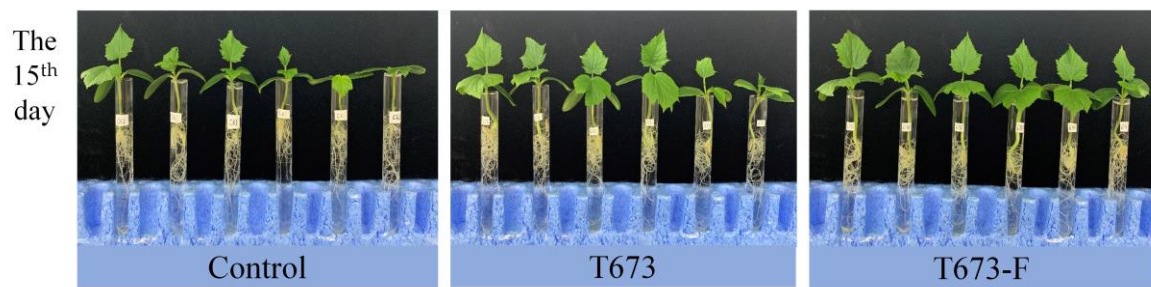

B

**Figure S7.** *T. harzianum* strain T673 and T673-F effects on plant growth. Growth of cucumber seedlings treated with spore suspension of T673, T673-F, or neither (control) on day 13 (A) and day 15 (B) post inoculation.

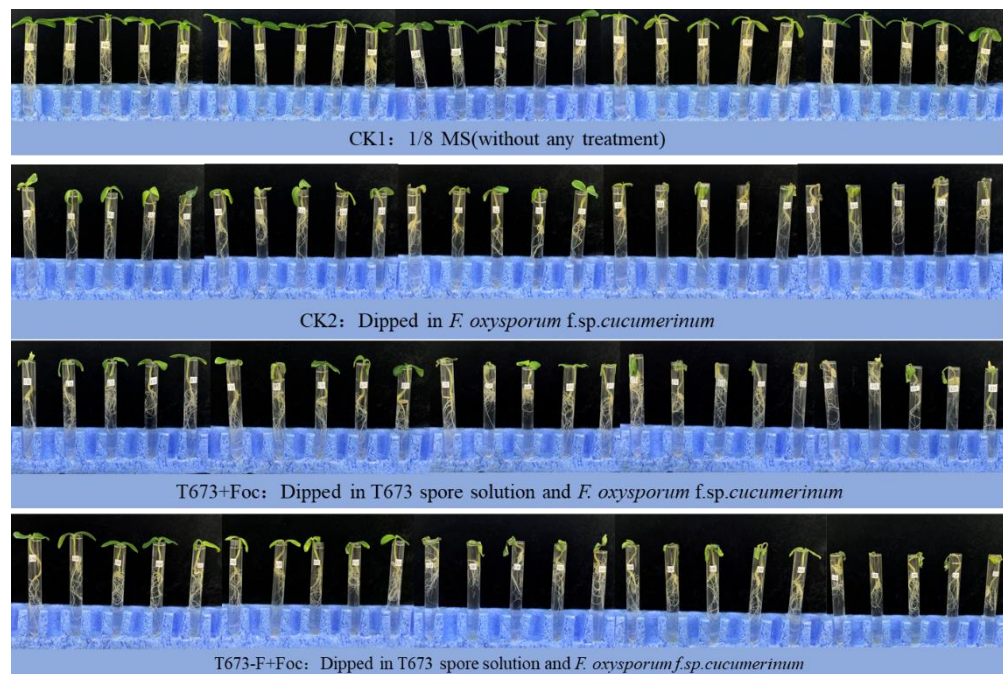

**Figure S8.** Biocontrol effects of strains T673 and T673-F against *F. oxysporum* f.sp.cucumerinum at 10 days after inoculation.

Table S1. The information of *Trichoderma* strains collected from soil of Xinjiang, Inner Mongolia, Jilin and Heilongjiang provinces of China

| The order of the isolates | Strain Number    | Strain Name                              | Region         |
|---------------------------|------------------|------------------------------------------|----------------|
| 112                       | CTCCSJ-G-QT40112 | <i>Trichoderma</i> .cf. <i>harzianum</i> | Inner Mongolia |
| 125                       | CTCCSJ-G-QT40125 | <i>Trichoderma longibrachiatum</i>       | Inner Mongolia |
| 127                       | CTCCSJ-F-KY40127 | <i>Trichoderma</i> .cf. <i>harzianum</i> | Inner Mongolia |
| 130                       | CTCCSJ-G-QT40130 | <i>Trichoderma</i> .cf. <i>harzianum</i> | Inner Mongolia |

|     |                  |                                    |                |
|-----|------------------|------------------------------------|----------------|
| 144 | CTCCSJ-F-KY40144 | <i>Trichoderma.cf. harzianum</i>   | Inner Mongolia |
| 154 | CTCCSJ-G-QT40154 | <i>Trichoderma longibrachiatum</i> | Inner Mongolia |
| 155 | CTCCSJ-F-KY40155 | <i>Trichoderma longibrachiatum</i> | Inner Mongolia |
| 169 | CTCCSJ-F-ZY40169 | <i>Trichoderma longibrachiatum</i> | Inner Mongolia |
| 173 | CTCCSJ-G-QT40173 | <i>Trichoderma longibrachiatum</i> | Inner Mongolia |
| 176 | CTCCSJ-G-QT40176 | <i>Trichoderma longibrachiatum</i> | Inner Mongolia |
| 189 | CTCCSJ-G-HB40189 | <i>Trichoderma longibrachiatum</i> | Xinjiang       |
| 199 | CTCCSJ-G-QT40199 | <i>Trichoderma longibrachiatum</i> | Xinjiang       |
| 203 | CTCCSJ-G-HB40203 | <i>Trichoderma.cf. harzianum</i>   | Inner Mongolia |
| 206 | CTCCSJ-G-HB40206 | <i>Trichoderma.cf. harzianum</i>   | Inner Mongolia |
| 213 | CTCCSJ-G-DK40213 | <i>Trichoderma longibrachiatum</i> | Inner Mongolia |
| 215 | CTCCSJ-G-HB40215 | <i>Trichoderma longibrachiatum</i> | Inner Mongolia |
| 241 | CTCCSJ-G-JK40241 | <i>Trichoderma longibrachiatum</i> | Xinjiang       |
| 246 | CTCCSJ-F-ZY40246 | <i>Trichoderma afroharzianum</i>   | Xinjiang       |
| 250 | CTCCSJ-F-ZY40250 | <i>Trichoderma afroharzianum</i>   | Xinjiang       |
| 255 | CTCCSJ-F-ZY40255 | <i>Trichoderma longibrachiatum</i> | Inner Mongolia |
| 264 | CTCCSJ-G-QT40264 | <i>Trichoderma longibrachiatum</i> | Inner Mongolia |
| 272 | CTCCSJ-G-QT40272 | <i>Trichoderma longibrachiatum</i> | Inner Mongolia |
| 273 | CTCCSJ-G-HB40273 | <i>Trichoderma longibrachiatum</i> | Inner Mongolia |
| 277 | CTCCSJ-G-HB40277 | <i>Trichoderma longibrachiatum</i> | Inner Mongolia |
| 291 | CTCCSJ-F-ZY40291 | <i>Trichoderma afroharzianum</i>   | Xinjiang       |
| 300 | CTCCSJ-F-ZY40300 | <i>Trichoderma afroharzianum</i>   | Inner Mongolia |
| 303 | CTCCSJ-G-QT40303 | <i>Trichoderma asperelloides</i>   | Xinjiang       |
| 320 | CTCCSJ-G-QT40320 | <i>Trichoderma hamatum</i>         | Inner Mongolia |
| 324 | CTCCSJ-G-QT40324 | <i>Trichoderma koningiopsis</i>    | Inner Mongolia |
| 330 | CTCCSJ-G-QT40330 | <i>Trichoderma gamsii</i>          | Inner Mongolia |
| 357 | CTCCSJ-G-JK40357 | <i>Trichoderma longibrachiatum</i> | Xinjiang       |
| 360 | CTCCSJ-G-DK40360 | <i>Trichoderma afroharzianum</i>   | Inner Mongolia |
| 366 | CTCCSJ-G-QT40366 | <i>Trichoderma longibrachiatum</i> | Inner Mongolia |
| 368 | CTCCSJ-F-KY40368 | <i>Trichoderma longibrachiatum</i> | Inner Mongolia |
| 388 | CTCCSJ-G-QT40388 | <i>Trichoderma afroharzianum</i>   | Inner Mongolia |
| 403 | CTCCSJ-G-HB40403 | <i>Trichoderma viridescens</i>     | Xinjiang       |
| 405 | CTCCSJ-G-HB40405 | <i>Trichoderma saturnisporum</i>   | Inner Mongolia |
| 408 | CTCCSJ-G-QT40408 | <i>Trichoderma longibrachiatum</i> | Inner Mongolia |
| 417 | CTCCSJ-G-JK40417 | <i>Hypocreasemiobis</i>            | Xinjiang       |
| 436 | CTCCSJ-G-HB40436 | <i>Trichoderma atroviride</i>      | Xinjiang       |
| 441 | CTCCSJ-G-HB40441 | <i>Trichoderma harzianum</i>       | Xinjiang       |
| 456 | CTCCSJ-G-HB40456 | <i>Trichoderma gamsii</i>          | Xinjiang       |
| 457 | CTCCSJ-G-HB40457 | <i>Trichoderma guizhouense</i>     | Inner Mongolia |
| 459 | CTCCSJ-G-HB40459 | <i>Trichoderma.cf. harzianum</i>   | Inner Mongolia |
| 460 | CTCCSJ-G-QT40460 | <i>Trichoderma.cf. harzianum</i>   | Inner Mongolia |
| 465 | CTCCSJ-G-QT40465 | <i>Trichoderma.cf. harzianum</i>   | Inner Mongolia |

|     |                  |                                    |                |
|-----|------------------|------------------------------------|----------------|
| 470 | CTCCSJ-G-HB40470 | <i>Trichoderma.cf. harzianum</i>   | Inner Mongolia |
| 477 | CTCCSJ-G-HB40477 | <i>Trichoderma.cf. harzianum</i>   | Inner Mongolia |
| 480 | CTCCSJ-G-HB40480 | <i>Trichoderma.cf. harzianum</i>   | Inner Mongolia |
| 483 | CTCCSJ-G-HB40483 | <i>Trichoderma harzianum</i>       | Inner Mongolia |
| 485 | CTCCSJ-G-HB40485 | <i>Trichoderma koningiopsis</i>    | Inner Mongolia |
| 491 | CTCCSJ-G-HB40491 | <i>Trichoderma.cf. harzianum</i>   | Inner Mongolia |
| 502 | CTCCSJ-G-HB40502 | <i>Trichoderma pleurotum</i>       | Xinjiang       |
| 503 | CTCCSJ-F-ZY40503 | <i>Trichoderma citrinoviride</i>   | Xinjiang       |
| 507 | CTCCSJ-G-QT40507 | <i>Hypocreapseudoharzianum</i>     | Xinjiang       |
| 517 | CTCCSJ-G-HB40517 | <i>Trichoderma citrinoviride</i>   | Xinjiang       |
| 519 | CTCCSJ-G-HB40519 | <i>Hypocreapseudoharzianum</i>     | Xinjiang       |
| 536 | CTCCSJ-G-HB40536 | <i>Trichoderma longibrachiatum</i> | Xinjiang       |
| 537 | CTCCSJ-G-HB40537 | <i>Trichoderma harzianum</i>       | Xinjiang       |
| 538 | CTCCSJ-F-ZY40538 | <i>Trichoderma citrinoviride</i>   | Xinjiang       |
| 542 | CTCCSJ-F-QT40542 | <i>Trichoderma rossicum</i>        | Xinjiang       |
| 550 | CTCCSJ-G-HB40550 | <i>Trichoderma asperellum</i>      | Xinjiang       |
| 556 | CTCCSJ-G-DK40556 | <i>Trichoderma harzianum</i>       | Xinjiang       |
| 558 | CTCCSJ-G-DK40558 | <i>Trichoderma harzianum</i>       | Xinjiang       |
| 579 | CTCCSJ-G-DK40579 | <i>Trichoderma harzianum</i>       | Xinjiang       |
| 623 | CTCCSJ-G-QT40623 | <i>Trichoderma harzianum</i>       | Xinjiang       |
| 624 | CTCCSJ-G-QT40624 | <i>Trichoderma harzianum</i>       | Xinjiang       |
| 639 | CTCCSJ-F-KZ40639 | <i>Trichoderma paraviridescens</i> | Xinjiang       |
| 642 | CTCCSJ-F-KZ40642 | <i>Trichoderma harzianum</i>       | Xinjiang       |
| 646 | CTCCSJ-G-JK40646 | <i>Trichoderma harzianum</i>       | Xinjiang       |
| 649 | CTCCSJ-F-KZ40649 | <i>Trichoderma harzianum</i>       | Xinjiang       |
| 651 | CTCCSJ-F-KZ40651 | <i>Trichoderma harzianum</i>       | Xinjiang       |
| 673 | CTCCSJ-G-HB40673 | <i>Trichoderma harzianum</i>       | Xinjiang       |
| 703 | CTCCSJ-F-KZ40703 | <i>Trichoderma citrinoviride</i>   | Xinjiang       |
| 713 | CTCCSJ-G-HB40713 | <i>Trichoderma rossicum</i>        | Xinjiang       |
| 769 | CTCCSJ-F-KZ40769 | <i>Trichoderma paraviridescens</i> | Xinjiang       |
| 782 | CTCCSJ-F-KZ40782 | <i>Trichoderma harzianum</i>       | Xinjiang       |
| 809 | CTCCSJ-F-KZ40809 | <i>Trichoderma harzianum</i>       | Xinjiang       |
| 810 | CTCCSJ-F-KZ40810 | <i>Trichoderma harzianum</i>       | Xinjiang       |
| 812 | CTCCSJ-F-KZ40812 | <i>Trichoderma paraviridescens</i> | Xinjiang       |
| 814 | CTCCSJ-G-QT40814 | <i>Trichoderma paraviridescens</i> | Xinjiang       |
| 816 | CTCCSJ-F-KZ40816 | <i>Trichoderma paraviridescens</i> | Xinjiang       |
| 827 | CTCCSJ-F-KZ40827 | <i>Trichoderma citrinoviride</i>   | Xinjiang       |
| 835 | CTCCSJ-G-QT40835 | <i>Trichoderma asperellum</i>      | Xinjiang       |
| 862 | CTCCSJ-G-HB40862 | <i>Trichoderma polysporum</i>      | Xinjiang       |
| 878 | CTCCSJ-G-HB40878 | <i>Trichoderma harzianum</i>       | Inner Mongolia |
| 900 | CTCCSJ-G-QT40900 | <i>Trichoderma asperelloides</i>   | Inner Mongolia |
| 916 | CTCCSJ-G-QT40916 | <i>Trichoderma harzianum</i>       | Inner Mongolia |

|      |                  |                                    |                |
|------|------------------|------------------------------------|----------------|
| 920  | CTCCSJ-G-HB40920 | <i>Trichoderma harzianum</i>       | Inner Mongolia |
| 921  | CTCCSJ-G-HB40921 | <i>Trichoderma asperelloides</i>   | Inner Mongolia |
| 925  | CTCCSJ-G-HB40925 | <i>Trichoderma harzianum</i>       | Inner Mongolia |
| 927  | CTCCSJ-G-HB40927 | <i>Trichoderma harzianum</i>       | Inner Mongolia |
| 929  | CTCCSJ-G-HB40929 | <i>Trichoderma harzianum</i>       | Inner Mongolia |
| 930  | CTCCSJ-G-HB40930 | <i>Trichoderma harzianum</i>       | Inner Mongolia |
| 932  | CTCCSJ-G-HB40932 | <i>Trichoderma harzianum</i>       | Inner Mongolia |
| 934  | CTCCSJ-G-HB40934 | <i>Trichoderma harzianum</i>       | Inner Mongolia |
| 939  | CTCCSJ-G-HB40939 | <i>Trichoderma harzianum</i>       | Inner Mongolia |
| 940  | CTCCSJ-G-HB40940 | <i>Trichoderma asperelloides</i>   | Inner Mongolia |
| 941  | CTCCSJ-G-HB40941 | <i>Trichoderma harzianum</i>       | Inner Mongolia |
| 946  | CTCCSJ-G-HB40946 | <i>Trichoderma asperelloides</i>   | Inner Mongolia |
| 957  | CTCCSJ-G-HB40957 | <i>Trichoderma harzianum</i>       | Inner Mongolia |
| 961  | CTCCSJ-F-KY40961 | <i>Trichoderma harzianum</i>       | Inner Mongolia |
| 972  | CTCCSJ-G-JK40972 | <i>Trichoderma harzianum</i>       | Inner Mongolia |
| 974  | CTCCSJ-G-JK40974 | <i>Trichoderma harzianum</i>       | Inner Mongolia |
| 979  | CTCCSJ-G-HB40979 | <i>Trichoderma harzianum</i>       | Inner Mongolia |
| 980  | CTCCSJ-G-JK40980 | <i>Trichoderma harzianum</i>       | Inner Mongolia |
| 987  | CTCCSJ-G-HB40987 | <i>Trichoderma harzianum</i>       | Inner Mongolia |
| 988  | CTCCSJ-G-HB40988 | <i>Trichoderma longibrachiatum</i> | Inner Mongolia |
| 989  | CTCCSJ-G-HB40989 | <i>Trichoderma harzianum</i>       | Inner Mongolia |
| 994  | CTCCSJ-G-QT40994 | <i>Trichoderma atroviride</i>      | Heilongjiang   |
| 1012 | CTCCSJ-G-DK41012 | <i>Trichoderma harzianum</i>       | Inner Mongolia |
| 1023 | CTCCSJ-G-HB41023 | <i>Trichoderma harzianum</i>       | Inner Mongolia |
| 1038 | CTCCSJ-G-HB41038 | <i>Trichoderma harzianum</i>       | Inner Mongolia |
| 1039 | CTCCSJ-G-HB41039 | <i>Trichoderma harzianum</i>       | Inner Mongolia |
| 1044 | CTCCSJ-G-HB41044 | <i>Trichoderma harzianum</i>       | Inner Mongolia |
| 1045 | CTCCSJ-G-HB41045 | <i>Trichoderma harzianum</i>       | Inner Mongolia |
| 1047 | CTCCSJ-F-KY41047 | <i>Trichoderma harzianum</i>       | Inner Mongolia |
| 1050 | CTCCSJ-G-QT41050 | <i>Trichoderma rossicum</i>        | Inner Mongolia |
| 1053 | CTCCSJ-G-HB41053 | <i>Trichoderma harzianum</i>       | Inner Mongolia |
| 1060 | CTCCSJ-G-JK41060 | <i>Trichoderma harzianum</i>       | Inner Mongolia |

**Table S2.** The RPKM data of the virus species obtained from metagenomic sequencing.

| unigene_ID | protein_description                                                                      | E-value   | 673_RPKM    |
|------------|------------------------------------------------------------------------------------------|-----------|-------------|
| Contig7    | YP_008327313.1 hypothetical protein N398_s2gp1<br>[Ustilaginoidea virens partitivirus 2] | 8.30E-104 | 30374.55381 |
| Contig7    | AGO04404.1 hypothetical protein [Ustilaginoidea<br>virens partitivirus]                  | 1.20E-102 | 30374.55381 |
| Contig7    | AGJ03720.1 hypothetical protein [Ustilaginoidea<br>virens mycovirus]                     | 6.00E-78  | 30374.55381 |



|            |                                                                                                    |           |             |
|------------|----------------------------------------------------------------------------------------------------|-----------|-------------|
| Contig11   | AGJ03719.1 RDRP [Ustilaginoidea virens partitivirus 3]                                             | 2.70E-202 | 36685.48928 |
| Contig11   | YP_008327312.1 RNA-dependent RNA polymerase [Ustilaginoidea virens partitivirus 2]                 | 3.60E-199 | 36685.48928 |
| Contig11   | AGL42312.1 RNA-dependent RNA polymerase [Colletotrichum acutatum RNA virus 1]                      | 1.80E-153 | 36685.48928 |
| Contig26   | YP_009272911.1 RNA-dependent RNA polymerase [Fusarium poae negative-stranded virus 1]              | 0.00E+00  | 4872.181635 |
| Contig26   | ALD89130.1 RNA-dependent RNA polymerase [Rhizoctonia solani negative-stranded virus 2]             | 1.10E-239 | 4872.181635 |
| Contig26   | ALD89111.1 RNA-dependent RNA polymerase [Rhizoctonia solani negative-stranded virus 3]             | 2.00E-230 | 4872.181635 |
| Contig94   | APG79235.1 RNA-dependent RNA polymerase [Beihai barnacle virus 5]                                  | 7.10E-151 | 768.8099433 |
| Contig94   | YP_009272912.1 RNA-dependent RNA polymerase [Fusarium poae negative-stranded virus 2]              | 6.20E-14  | 768.8099433 |
| Contig7906 | ACJ15076.1 nonstructural protein 1 [Influenza A virus (A/Muscovy duck/Vietnam/NCVD-22/2007(H5N1))] | 2.50E-70  | 0.770317696 |
| Contig7906 | AAR99625.1 non-structural protein NS1 [Influenza A virus (A/duck/China/E319-2/03(H5N1))]           | 3.30E-70  | 0.770317696 |
| Contig7906 | ACB70828.1 nonstructural protein 1 [Influenza A virus (A/Muscovy duck/Vietnam/57/2007(H5N1))]      | 4.30E-70  | 0.770317696 |
| Contig9788 | ABN49709.1 protein H [Escherichia virus phiX174]                                                   | 3.20E-48  | 0.657831378 |
| Contig9788 | ADM34807.1 protein H [Escherichia virus phiX174]                                                   | 3.20E-48  | 0.657831378 |

**Table S3.** Primers used in this work

| Primer name     | Primer sequence (from 5' to 3') | Used in the step of race       |
|-----------------|---------------------------------|--------------------------------|
| Contig 7-F      | TCAACATCCAAAACCTACCGTTTTGTTAC   | Whole contig seven             |
| Contig7 -R      | TCCAGGTAAACCCCTCATAGGTT         |                                |
| Contig 11 -F    | GACGCTCTTCCGATCTCTCA            | Whole contig eleven            |
| Contig 11 -R    | TGTTCAAAAAGTTCTCGACCCGTC        |                                |
| C7-5' primer A  | TTCCCTCAAGTTCAAAGTGTCGA         | 5'RACE (Reverse transcription) |
| C7-5' primer B  | ATGTTGCGGGCGGCTAAGAC            | 5'RACE (1st PCR)               |
| C7-5' primer C  | TCAGCGGGAGCGGGGAC               | 5'RACE (2nd PCR)               |
| C7-3' primer A  | GTCCGATTACCAACGCCTACTCTGT       | 3'RACE (1st PCR)               |
| C7-3' primerB   | CTGCTCCCGGTCACGAACG             | 3'RACE (2nd PCR)               |
| C11-5' primer A | TGGCATACTCGATAAAGCATTGAAG       | 5'RACE (Reverse transcription) |
| C11-5' primer B | CGGAACAACCTTGGTCTGCACTGA        | 5'RACE (1st PCR)               |
| C11-5' primer C | ATTACTCGGCCTTGGCATTGC           | 5'RACE (2nd PCR)               |
| C11-3' primer A | CCTTCTTGTCGGATTGGTCTATGAT       | 3'RACE (1st PCR)               |
| C11-3' primer B | CACGAGTGTAACCCCTGCAGCG          | 3'RACE (2nd PCR)               |



**Table S4.** The used RdRP and hypothetical protein data of mycoviruses in the phylogenetic analysis.

**A.** The used RdRP data of mycoviruses in the phylogenetic analysis.

| Accession Number of RdRP | mycovirus name                                      | The host                              | Similarity |
|--------------------------|-----------------------------------------------------|---------------------------------------|------------|
| QED88095.1               | Colletotrichum gloeosporioidespartitivirus 1        | <i>Colletotrichum gloeosporioides</i> | 76.4%      |
| QHD64801.1               | Plasmoparaviticola lesion associated Partitivirus 3 | <i>Plasmoparaviticola</i>             | 72.8%      |
| QJW70316.1               | Erysiphe necator associated partitivirus 7          | <i>Erysiphe necator</i>               | 72.6%      |
| QHD64807.1               | Plasmoparaviticola lesion associated Partitivirus 4 | <i>Plasmoparaviticola</i>             | 71.6%      |
| QKO02079.1               | Macrophominaphaseolina partitivirus 1               | <i>Macrophominaphaseolina</i>         | 69.1%      |
| AGJ03719.1               | Ustilaginoidea virens partitivirus 3                | <i>Ustilaginoidea virens</i>          | 64.3%      |
| YP_008327312.1           | Ustilaginoidea virens partitivirus 2                | <i>Ustilaginoidea virens</i>          | 62.7%      |
| QDE53634.1               | Aspergillus flavus partitivirus 1                   | <i>Aspergillus flavus</i>             | 48.5%      |
| AGL42312.1               | Colletotrichum acutatum RNA virus 1                 | <i>Colletotrichum acutatum</i>        | 48.9%      |
| AIE47694.1               | Botryosphaeria dothidea virus 1                     | <i>Botryosphaeria dothidea</i>        | 48.0%      |
| QOL02536.1               | Fusarium cerealispartitivirus 1                     | <i>Fusarium cerealis</i>              | 49.4%      |
| QKK35392.1               | Erysiphe necator associated gamma partitivirus 1    | <i>Erysiphe necator</i>               | 31.7%      |
| ABC86749.1               | Aspergillus ochraceous virus                        | <i>Aspergillus ochraceous</i>         | 29.7%      |
| AYP71818.1               | Aspergillus ochraceous virus                        | <i>Aspergillus ochraceous</i>         | 30.1%      |
| AXY93817.1               | Medicago sativa alphapartitivirus 1                 | <i>Medicago sativa</i>                | 16.8%      |
| AMW07365.2               | Rhizoctonia solani dsRNA virus 3                    | <i>Rhizoctonia solani</i>             | 15.6%      |
| BAV56297.1               | Fusarium poae virus 1-240374                        | <i>Fusarium poae</i>                  | 12.2%      |
| YP_009177606.1           | Rosellinianecatrixpartitivirus 6                    | <i>Rosellinianecatrix</i>             | 13.0%      |
| CBW77436.1               | Fig cryptic virus                                   | <i>Fig cryptic</i>                    | 16.6%      |
| AEJ07890.1               | Pepper cryptic virus 1                              | <i>Pepper cryptic</i>                 | 16.8%      |
| ARS33771.1               | Cryptosporidium parvum virus 1                      | <i>Cryptosporidium parvum</i>         | 17.2%      |

**B.** The used hypothetical protein data of mycoviruses in the phylogenetic analysis.

| Accession Number<br>of hypothetical protein | mycovirus name                                         | The host                                  | Similarity |
|---------------------------------------------|--------------------------------------------------------|-------------------------------------------|------------|
| QED88096.1                                  | Colletotrichum<br>gloeosporioidespartitivir<br>s 1     | <i>Colletotrichum<br/>gloeosporioides</i> | 63.6%      |
| QJW70323.1                                  | Erysiphe necator<br>associated partitivirus 7          | <i>Erysiphe necator</i>                   | 60.5%      |
| QDK65070.1                                  | Phomamatteucciicolapartiti<br>virus 1                  | <i>Phomamatteucciicola</i>                | 61.6%      |
| QHD64811.1                                  | Plasmoparaviticola lesion<br>associated Partitivirus 4 | <i>Plasmoparaviticola</i>                 | 58.2%      |
| YP_008327313.1                              | Ustilaginoidea virens<br>partitivirus 2                | <i>Ustilaginoidea virens</i>              | 54.6%      |
| AGO04404.1                                  | Ustilaginoidea virens<br>partitivirus                  | <i>Ustilaginoidea virens</i>              | 54.6%      |
| QKO02080.1                                  | Macrophominaphaseolina<br>partitivirus 1               | <i>Macrophominaphaseolina</i>             | 52.3%      |
| AGJ03720.1                                  | Ustilaginoidea virens<br>mycovirus                     | <i>Ustilaginoidea virens</i>              | 44.4%      |
| AGL42313.1                                  | Colletotrichum acutatum<br>RNA virus 1                 | <i>Colletotrichum acutatum</i>            | 25.7%      |
| QDE53635.1                                  | Aspergillus flavus<br>partitivirus 1                   | <i>Aspergillus flavus</i>                 | 22.5%      |
| AIE47695.1                                  | Botryosphaeria dothidea<br>virus 1                     | <i>Botryosphaeria dothidea</i>            | 23.9%      |
| QOL02537.1                                  | Fusarium<br>cerealispertitivirus 1                     | <i>Fusarium cerealis</i>                  | 20.5%      |
| AXY93815.1                                  | Medicago sativa<br>alphapartitivirus 1                 | <i>Medicago sativa</i>                    | 12.6%      |
| AMW07366.2                                  | Rhizoctonia solani<br>dsRNA virus 3                    | <i>Rhizoctonia solani</i>                 | 12.5%      |
| BAV56298.1                                  | Fusarium poae virus 1-<br>240374                       | <i>Fusarium poae</i>                      | 7.5%       |
| CBW77437.1                                  | Fig cryptic virus                                      | <i>Fig cryptic</i>                        | 12.0%      |
| AEJ07891.1                                  | Pepper cryptic virus 1                                 | <i>Pepper cryptic</i>                     | 11.6%      |
| ARS33772.1                                  | Cryptosporidium parvum<br>virus 1                      | <i>Cryptosporidium parvum</i>             | 10.4%      |
| BAT24480.1                                  | Rosellinianecatrixpartitivi<br>rus 6                   | <i>Rosellinianecatrix</i>                 | 6.7%       |

**Table S5.** The accession numbers for Trichoderma HarzianumPartitivirus 2 (ThPV2).

| Accession number | The protein encoding                                                    |
|------------------|-------------------------------------------------------------------------|
| OL457022         | Trichoderma HarzianumPartitivirus 2 (ThPV2)-RNA depended RNA polymerase |
| OL457023         | Trichoderma HarzianumPartitivirus 2 (ThPV2)-hypothetical protein        |

**Table S6** Growth rate of strain T673 and strain T673-F on PDA medium.

| Repeats                                                     | Strain T673 (mm/d)  | Strain T673F (mm/d) |
|-------------------------------------------------------------|---------------------|---------------------|
| 1                                                           | 27.155              | 27.25               |
| 2                                                           | 23.195              | 27.37               |
| 3                                                           | 25.04               | 25.45               |
| 4                                                           | 27.535              | 27.77               |
| 5                                                           | 27.26               | 26.855              |
| 6                                                           | 27.28               | 27.035              |
| 7                                                           | 27.67               | 25.985              |
| 8                                                           | 24.785              | 26.205              |
| 9                                                           | 27.28               | 26.245              |
| 10                                                          | 27.9                | 26.864              |
| 11                                                          | 26.765              | 20.955              |
| 12                                                          | 26.97               | 27                  |
| 13                                                          | 27.375              | 26.965              |
| 14                                                          | 27.445              | 27.62               |
| 15                                                          | 28.02               | 27.055              |
| 16                                                          | 25.91               | 27                  |
| 17                                                          | 24.54               | 27.025              |
| 18                                                          | 27.23               | 27.235              |
| 19                                                          | 26.155              | 26.12               |
| 20                                                          | 27.31               | 24.97               |
| 21                                                          | 25.4                | 27.785              |
| 22                                                          | 26.605              | 27.135              |
| 23                                                          | 25.405              | 27.735              |
| 24                                                          | 26.495              | 27.135              |
| 25                                                          | 27.625              | 26.525              |
| $\bar{x}$                                                   | 26.574              | 26.61156            |
| Standard deviations                                         | 1.223487161         | 1.369245993         |
| Statistical<br>significance of<br>strain T673 and<br>T673-F | 0.9216127755 > 0.05 |                     |

**Table S7** Growth rate of strain T673 and strain T673-F on CZA medium.

| Repeats | Strain T673 (mm/d) | Strain T673F (mm/d) |
|---------|--------------------|---------------------|
| 1       | 7.075              | 12.36               |
| 2       | 12.2375            | 10.575              |
| 3       | 11.1025            | 10.7675             |
| 4       | 10.63              | 11.075              |
| 5       | 13.245             | 11.8825             |
| 6       | 7.247              | 13.14               |
| 7       | 2.9375             | 10.8375             |
| 8       | 9.18               | 13.0425             |
| 9       | 12.0825            | 13.35               |
| 10      | 11.73              | 13.89               |
| 11      | 6.345              | 9.3825              |
| 12      | 9.0025             | 12.1425             |
| 13      | 7.91               | 12.58               |
| 14      | 7.9825             | 11.075              |
| 15      | 14.565             | 13.3                |
| 16      | 12.2375            | 11.54               |
| 17      | 15.8275            | 9.085               |
| 18      | 8.5725             | 14.025              |
| 19      | 13.7725            | 11.09               |

|                               |                    |           |
|-------------------------------|--------------------|-----------|
| 20                            | 12.02              | 13.7175   |
| 21                            | 9.6475             | 11.725    |
| 22                            | 12.05              | 12.2075   |
| 23                            | 9.825              | 8.965     |
| 24                            | 10.7575            | 9.335     |
| 25                            | 11.6475            | 14.005    |
| $\bar{x}$                     | 10.39238           | 11.8038   |
| <b>Standard deviations</b>    | 2.868123033        | 1.5746946 |
| <b>Statistical</b>            |                    |           |
| <b>significance of strain</b> | 0.038334154 < 0.05 |           |
| <b>T673 and T673-F</b>        |                    |           |

**Table S8** Biomass comparison, standard deviation and significant difference analysis of biomass between two strains strain T673 and T673-F.

| Repeats                    | Strain T673 (g)    | Strain T673-F (g) |
|----------------------------|--------------------|-------------------|
| 1                          | 0.381              | 0.379             |
| 2                          | 0.306              | 0.332             |
| 3                          | 0.335              | 0.389             |
| 4                          | 0.346              | 0.384             |
| 5                          | 0.273              | 0.398             |
| 6                          | 0.291              | 0.405             |
| 7                          | 0.312              | 0.283             |
| 8                          | 0.333              | 0.362             |
| 9                          | 0.309              | 0.281             |
| 10                         | 0.297              | 0.316             |
| $\bar{x}$                  | 0.3183             | 0.3529            |
| <b>Standard deviations</b> | 0.031130728        | 0.046710575       |
| <b>Statistical</b>         |                    |                   |
| <b>significance of</b>     | 0.065502424 > 0.05 |                   |
| <b>strain T673 and</b>     |                    |                   |
| <b>T673-F</b>              |                    |                   |

**Table S9.** Statistical analysis of conidiosporesporulation capacity of strains T673 and T673-F on PDA medium.

| Repetitions  | Medium number | Strain T673 (*10 <sup>8</sup> per/ml) | Strain T673-F (*10 <sup>8</sup> per/ml) |
|--------------|---------------|---------------------------------------|-----------------------------------------|
| Repetition 1 | 1             | 3                                     | 2.3                                     |
|              | 2             | 3.55                                  | 0.85                                    |
|              | 3             | 4.1                                   | 1.3                                     |
|              | 4             | 6.35                                  | 1.65                                    |
|              | 5             | 6.45                                  | 4.05                                    |
|              | 6             | 4.9                                   | 1.75                                    |
|              | 7             | 4.8                                   | 2.4                                     |
|              | 8             | 4.8                                   | 2.4                                     |
| Repetition 2 | 1             | 3.75                                  | 1.15                                    |
|              | 2             | 3.1                                   | 1.25                                    |
|              | 3             | 4.75                                  | 1.6                                     |
|              | 4             | 4.7                                   | 1.5                                     |
|              | 5             | 6.2                                   | 2.3                                     |
|              | 6             | 4.3                                   | 2.55                                    |
|              | 7             | 4.8                                   | 4.05                                    |
|              | 8             | 5.3                                   | 2.1                                     |

|                                                        |   |                  |      |
|--------------------------------------------------------|---|------------------|------|
| Repetition 3                                           | 1 | 1.8              | 1.4  |
|                                                        | 2 | 4.05             | 1.15 |
|                                                        | 3 | 7.5              | 2.1  |
|                                                        | 4 | 5.55             | 1.7  |
|                                                        | 5 | 5.6              | 1.45 |
|                                                        | 6 | 6.3              | 2.4  |
|                                                        | 7 | 7.05             | 2.5  |
|                                                        | 8 | 3.4              | 2.75 |
| Statistical significance of strain T673 and T673-F (p) |   | 4.51796E-11<0.01 |      |

**Table S10.** Statistical analysis of chlamydospores sporulation of strain T673 and T673-F in chlamydospore induction medium on the fifth day

| Repetitions                                            | Medium number | Strain T673 (*10 <sup>7</sup> per/ml) | Strain T673-F (*10 <sup>7</sup> per/ml) |
|--------------------------------------------------------|---------------|---------------------------------------|-----------------------------------------|
| Repetition 1                                           | 1             | 7.25                                  | 2                                       |
|                                                        | 2             | 8.5                                   | 3                                       |
|                                                        | 3             | 6.25                                  | 2.5                                     |
|                                                        | 4             | 7.4                                   | 2.45                                    |
|                                                        | 5             | 6.1                                   | 2.9                                     |
|                                                        | 6             | 8.35                                  | 2.75                                    |
|                                                        | 7             | 7.15                                  | 2.1                                     |
|                                                        | 8             | 7.9                                   | 2.3                                     |
| Repetition 2                                           | 1             | 7.55                                  | 2.15                                    |
|                                                        | 2             | 7.85                                  | 2.8                                     |
|                                                        | 3             | 6.9                                   | 2.35                                    |
|                                                        | 4             | 8.15                                  | 3.2                                     |
|                                                        | 5             | 7.7                                   | 2.4                                     |
|                                                        | 6             | 7.9                                   | 2.8                                     |
|                                                        | 7             | 5.95                                  | 2.2                                     |
|                                                        | 8             | 7.4                                   | 2.35                                    |
| Repetition 3                                           | 1             | 7.1                                   | 2.75                                    |
|                                                        | 2             | 7.65                                  | 1.95                                    |
|                                                        | 3             | 7.6                                   | 2                                       |
|                                                        | 4             | 7.2                                   | 2.9                                     |
|                                                        | 5             | 7.35                                  | 2.65                                    |
|                                                        | 6             | 8                                     | 2.8                                     |
|                                                        | 7             | 7.25                                  | 2.7                                     |
|                                                        | 8             | 7.45                                  | 2.55                                    |
| Statistical significance of strain T673 and T673-F (p) |               | 1.68222E-33<0.01                      |                                         |

**Table S11.** Statistical results of the growth promoting effects and reducing resistance of T673 and T673-F to *F. oxysporum*.f. sp. *cucumerinum* on cucumber planting in the glass tube.

**A.** Plain results of growth promoting effects of T673 and T673-F on cucumber planting in the glass tube on the 13<sup>th</sup> day (mm).

| The number of days       | Repetitions  | Seedling number | Control            |                     |                    | T673               |                     |                    | T673F              |                     |                    |
|--------------------------|--------------|-----------------|--------------------|---------------------|--------------------|--------------------|---------------------|--------------------|--------------------|---------------------|--------------------|
|                          |              |                 | The width of leave | The length of leave | The length of stem | The width of leave | The length of leave | The length of stem | The width of leave | The length of leave | The length of stem |
| The 13 <sup>th</sup> day | Repetition 1 | 1               | 28.63              | 21.97               | 30.52              | 39.22              | 27.23               | 55.16              | 40.15              | 31.66               | 50.61              |
|                          |              | 2               | 21.38              | 19.53               | 30.25              | 32.49              | 22.07               | 36.07              | 37.24              | 26.39               | 66.25              |
|                          |              | 3               | 15.34              | 13.88               | 38.95              | 28.58              | 29.23               | 35.56              | 33.56              | 30.13               | 58.01              |
|                          |              | 4               | 14.95              | 11.85               | 27.12              | 18.61              | 16.36               | 35.84              | 32.47              | 26.19               | 56.25              |
|                          |              | 5               | 15.71              | 11.92               | 30.96              | 18.38              | 11.81               | 36.42              | 29.49              | 27.98               | 60.04              |
|                          |              | 6               | 12.80              | 14.16               | 33.04              | 23.60              | 17.56               | 40.68              | 22.93              | 20.98               | 55.20              |
|                          |              | 7               | 33.19              | 24.21               | 31.09              | 37.53              | 29.18               | 58.27              | 43.07              | 29.31               | 51.68              |
|                          |              | 8               | 26.85              | 22.79               | 42.12              | 36.63              | 26.77               | 37.91              | 37.32              | 26.08               | 49.59              |
|                          | Repetition 2 | 1               | 23.295             | 22.51               | 33.82              | 34.96              | 28.96               | 39.04              | 40.56              | 29.98               | 52.87              |
|                          |              | 2               | 29.167             | 23.717              | 34.24              | 35.7               | 25.74               | 57.94              | 35.09              | 31.37               | 58.07              |
|                          |              | 3               | 26.491             | 22.33               | 33.18              | 34.67              | 30.44               | 38.17              | 33.13              | 34.43               | 51.80              |
|                          |              | 4               | 17.31              | 14.82               | 33.54              | 31.22              | 24.94               | 36.67              | 34.17              | 20.28               | 46.65              |
|                          |              | 5               | 16.7               | 12.46               | 29.95              | 31.36              | 30.87               | 42.53              | 34.09              | 26.95               | 51.01              |
|                          |              | 6               | 13.09              | 15.25               | 39.15              | 26.44              | 20.86               | 36.46              | 33.55              | 28.84               | 42.87              |
|                          |              | 7               | 16.3               | 18.01               | 32.55              | 23.37              | 19.18               | 41.18              | 32.02              | 30.57               | 46.61              |
|                          |              | 8               | 20.93              | 18.69               | 40.12              | 29.73              | 23.19               | 37.63              | 33.03              | 28.25               | 38.20              |
|                          | Repetition 3 | 1               | 10.85              | 9.58                | 26.81              | 26.21              | 25.70               | 32.58              | 29.97              | 27.25               | 40.56              |
|                          |              | 2               | 15.05              | 12.79               | 23.94              | 23.85              | 24.63               | 37.27              | 30.31              | 30.01               | 38.42              |
|                          |              | 3               | 15.74              | 14.86               | 37.74              | 20.47              | 17.70               | 35.97              | 24.98              | 20.53               | 43.42              |
|                          |              | 4               | 13.33              | 14.58               | 24.89              | 19.36              | 14.96               | 34.80              | 24.79              | 23.02               | 39.03              |
|                          |              | 5               | 11.53              | 13.43               | 35.38              | 16.99              | 18.67               | 36.04              | 25.49              | 24.97               | 47.37              |

|  |  |   |       |       |       |       |       |       |       |       |       |
|--|--|---|-------|-------|-------|-------|-------|-------|-------|-------|-------|
|  |  | 6 | 14.73 | 14.04 | 30.64 | 16.98 | 17.20 | 34.62 | 36.95 | 29.65 | 39.62 |
|  |  | 7 | 17.02 | 13.11 | 27.12 | 18.69 | 13.04 | 47.67 | 22.16 | 21.81 | 33.04 |
|  |  | 8 | 18.21 | 17.59 | 25.53 | 14.24 | 14.97 | 29.55 | 23.06 | 23.85 | 40.09 |

**B.** Plain results of growth promoting effects of T673 and T673-F on cucumber planting in the glass tube on the 15<sup>th</sup> day (mm).

| The number of days       | Repetitions  | Seedling number | Control            |                     |                    | T673               |                     |                    | T673F              |                     |                    |
|--------------------------|--------------|-----------------|--------------------|---------------------|--------------------|--------------------|---------------------|--------------------|--------------------|---------------------|--------------------|
|                          |              |                 | The width of leave | The length of leave | The length of stem | The width of leave | The length of leave | The length of stem | The width of leave | The length of leave | The length of stem |
| The 15 <sup>th</sup> day | Repetition 1 | 1               | 34.84              | 24.44               | 31.78              | 42.15              | 30.71               | 56.64              | 41.28              | 32.84               | 51.85              |
|                          |              | 2               | 30.38              | 22.60               | 30.43              | 37.44              | 26.48               | 37.12              | 40.36              | 34.79               | 66.55              |
|                          |              | 3               | 20.39              | 17.21               | 39.56              | 34.99              | 33.31               | 37.41              | 39.12              | 37.52               | 58.88              |
|                          |              | 4               | 17.76              | 16.49               | 27.29              | 23.58              | 24.19               | 38.03              | 38.05              | 32.70               | 57.10              |
|                          |              | 5               | 19.10              | 16.94               | 32.58              | 21.59              | 16.22               | 38.73              | 35.98              | 33.54               | 61.99              |
|                          |              | 6               | 21.93              | 18.11               | 33.14              | 28.36              | 25.73               | 40.78              | 27.69              | 26.26               | 56.57              |
|                          |              | 7               | 39.78              | 30.29               | 33.3               | 41.48              | 35.55               | 59.03              | 44.04              | 30.25               | 51.99              |
|                          |              | 8               | 34.08              | 27.03               | 43.28              | 41.64              | 36.05               | 40.27              | 39.49              | 32.97               | 50.13              |
|                          | Repetition 2 | 1               | 29.86              | 27.93               | 35.84              | 37.51              | 33.2                | 40.04              | 45.83              | 33.77               | 52.94              |
|                          |              | 2               | 34.17              | 29.22               | 35.73              | 39.69              | 32.17               | 59.31              | 37.6               | 32.85               | 59.62              |
|                          |              | 3               | 30.91              | 26.60               | 33.62              | 39.09              | 34.63               | 39.11              | 37.33              | 35.28               | 52.97              |
|                          |              | 4               | 21.47              | 17.28               | 36.07              | 34.82              | 30.99               | 36.90              | 35.19              | 27.76               | 47.18              |
|                          |              | 5               | 23.38              | 18.36               | 30.85              | 35.24              | 31.67               | 42.96              | 38.01              | 32.64               | 52.71              |
|                          |              | 6               | 20.03              | 19.40               | 39.36              | 31.04              | 28.4                | 38.21              | 38.52              | 33.49               | 43.51              |



|  |                 |   |       |       |       |       |       |       |       |       |       |
|--|-----------------|---|-------|-------|-------|-------|-------|-------|-------|-------|-------|
|  |                 | 7 | 19.69 | 22.45 | 32.98 | 28.88 | 26.75 | 43.26 | 36.27 | 35.05 | 48.69 |
|  |                 | 8 | 23.72 | 21.51 | 40.24 | 32.12 | 25.16 | 37.83 | 37.48 | 34.59 | 38.43 |
|  | Repetition<br>3 | 1 | 11.36 | 10.49 | 27.18 | 33.54 | 30.53 | 33.62 | 34.52 | 31.06 | 41.75 |
|  |                 | 2 | 19.79 | 16.34 | 25.01 | 27.73 | 25.18 | 37.81 | 32.73 | 31.61 | 39.2  |
|  |                 | 3 | 20.65 | 20.99 | 38.58 | 27.64 | 26.52 | 36.17 | 29.47 | 25.63 | 45.03 |
|  |                 | 4 | 14.21 | 16.22 | 24.99 | 26.77 | 20.19 | 35.19 | 30.85 | 28.63 | 40.2  |
|  |                 | 5 | 12.90 | 16.7  | 35.36 | 23.66 | 24.71 | 36.79 | 30.45 | 28.62 | 47.53 |
|  |                 | 6 | 16.51 | 18.46 | 32.13 | 21.47 | 20.38 | 35.06 | 38.27 | 34.09 | 40.86 |
|  |                 | 7 | 23.82 | 17.59 | 30.90 | 23.94 | 19.29 | 47.81 | 27.61 | 25.1  | 36.62 |
|  |                 | 8 | 22.19 | 20.33 | 26.04 | 15.35 | 15.01 | 30.6  | 28.47 | 27.08 | 40.33 |

C.Plain results of growth promoting effects of T673 and T673-F on cucumber planting in the glass tube on the 35<sup>th</sup> day (mm).

| The number of days       | Repetitions     | Seedling number | Control            |                     |                    | T673               |                     |                    | T673F              |                     |                    |
|--------------------------|-----------------|-----------------|--------------------|---------------------|--------------------|--------------------|---------------------|--------------------|--------------------|---------------------|--------------------|
|                          |                 |                 | The width of leave | The length of leave | The length of stem | The width of leave | The length of leave | The length of stem | The width of leave | The length of leave | The length of stem |
| The 35 <sup>th</sup> day | Repetition<br>1 | 1               | 43.26              | 36.73               | 34.43              | 43.72              | 33.94               | 56.8               | 42.56              | 37.01               | 52.35              |
|                          |                 | 2               | 37.06              | 39.94               | 30.85              | 40.91              | 32.73               | 37.26              | 41.97              | 41.26               | 66.68              |
|                          |                 | 3               | 39.29              | 34.11               | 39.19              | 39.12              | 38.42               | 40.44              | 40.09              | 39.47               | 61.8               |
|                          |                 | 4               | 28.75              | 33.35               | 29.57              | 36.05              | 31.54               | 39.1               | 40.69              | 39.17               | 58.95              |
|                          |                 | 5               | 25.3               | 24.28               | 37.66              | 34.060             | 34.71               | 41.63              | 41.820             | 45.56               | 62.01              |
|                          |                 | 6               | 25.47              | 25.27               | 34.70              | 39.540             | 38.72               | 42.9               | 38.59              | 35.95               | 56.71              |
|                          |                 | 7               | 43.64              | 38.53               | 34.83              | 42.59              | 39.60               | 59.21              | 46.32              | 44.51               | 52.88              |
|                          |                 | 8               | 39.72              | 38.57               | 44.97              | 43.68              | 36.92               | 40.97              | 41.68              | 39.07               | 52.19              |

|  |                 |   |       |       |       |       |       |       |       |       |       |
|--|-----------------|---|-------|-------|-------|-------|-------|-------|-------|-------|-------|
|  | Repetition<br>2 | 1 | 32.54 | 30.68 | 36.02 | 39.69 | 33.47 | 40.35 | 48.37 | 47.07 | 53.23 |
|  |                 | 2 | 41.59 | 39.07 | 35.98 | 41.94 | 33.60 | 59.42 | 40.59 | 39.81 | 60.85 |
|  |                 | 3 | 36.28 | 34.88 | 33.81 | 39.86 | 35.17 | 40.01 | 42.57 | 40.18 | 52.99 |
|  |                 | 4 | 34.95 | 31.27 | 37.01 | 36.92 | 32.44 | 37.29 | 38.61 | 37.11 | 48.67 |
|  |                 | 5 | 34.55 | 33.16 | 30.63 | 42.15 | 35.67 | 43.83 | 42.58 | 30.64 | 53.18 |
|  |                 | 6 | 32.91 | 30.52 | 40.41 | 33.96 | 31.04 | 38.36 | 40.88 | 38.67 | 45.97 |
|  |                 | 7 | 27.86 | 26.30 | 33.60 | 35.03 | 31.26 | 43.67 | 40.15 | 40.01 | 50.77 |
|  |                 | 8 | 26.81 | 23.79 | 41.41 | 38.64 | 31.22 | 38.12 | 42.96 | 40.61 | 39.21 |
|  | Repetition<br>3 | 1 | 20.37 | 18.36 | 27.09 | 42.2  | 33.92 | 33.71 | 43.75 | 42.88 | 42.46 |
|  |                 | 2 | 27.04 | 26.51 | 25.73 | 35.59 | 30.64 | 38.03 | 37.64 | 37.89 | 40.79 |
|  |                 | 3 | 27.90 | 25.16 | 38.63 | 34.62 | 32.51 | 36.47 | 34.79 | 32.61 | 47.58 |
|  |                 | 4 | 23.46 | 20.17 | 25.67 | 32.85 | 29.66 | 35.3  | 38.45 | 35.60 | 42.01 |
|  |                 | 5 | 19.75 | 19.44 | 35.89 | 27.19 | 25.41 | 36.82 | 41.94 | 37.71 | 49.72 |
|  |                 | 6 | 23.12 | 22.43 | 33.70 | 25.90 | 23.47 | 35.34 | 43.81 | 42.22 | 41.98 |
|  |                 | 7 | 27.06 | 25.18 | 30.61 | 29.88 | 26.19 | 47.93 | 38.84 | 36.41 | 37.08 |
|  |                 | 8 | 28.72 | 26.11 | 27.77 | 20.07 | 16.07 | 30.87 | 37.1  | 32.05 | 41.43 |

D. Significant difference about the growth promoting effects of T673 and T673-F on cucumber planting in the glass tube on the 13<sup>th</sup>, 15<sup>th</sup> and 35<sup>th</sup> day (mm).

|                                | On the 13th day |              |            | On the 15th day |              |            | On the 35th day |              |             |
|--------------------------------|-----------------|--------------|------------|-----------------|--------------|------------|-----------------|--------------|-------------|
|                                | Control/673     | Control/673F | T673/T673F | Control/673     | Control/673F | T673/T673F | Control/673     | Control/673F | T673/T673F  |
| <i>p</i> (The width of leave)  | 0.0002509       | 7.74462E-10  | 0.0080878  | 0.0007087       | 1.37213E-08  | 0.0115461  | 0.0071858       | 9.01751E-08  | 0.0016135   |
| <i>p</i> (The length of leave) | 0.0005496       | 1.58416E-11  | 0.0011331  | 0.0001096       | 8.8503E-12   | 0.0030422  | 0.1250579       | 2.41907E-07  | 5.89155E-06 |

|                      |           |            |           |           |             |           |           |             |           |
|----------------------|-----------|------------|-----------|-----------|-------------|-----------|-----------|-------------|-----------|
| (The length of stem) | 0.0001711 | 2.2357E-10 | 0.0006000 | 0.0001608 | 3.50508E-10 | 0.0008010 | 0.0002873 | 7.39557E-11 | 0.0002083 |
|----------------------|-----------|------------|-----------|-----------|-------------|-----------|-----------|-------------|-----------|

F. Situation of cucumber flowering and bud of T673 and T673-F in the glass tube on the 25th and 35th day.

| Repetitions  | Treatment | Index                       | The number of flowering on 25th day | The number of flowering on 35th day |
|--------------|-----------|-----------------------------|-------------------------------------|-------------------------------------|
| Repetition 1 | Control   | The number of flowering     | 0                                   | 0                                   |
|              |           | The number of bud           | 0                                   | 1                                   |
|              |           | The number of non-flowering | 8                                   | 7                                   |
|              | T673      | The number of flowering     | 0                                   | 2                                   |
|              |           | The number of bud           | 3                                   | 3                                   |
|              |           | The number of non-flowering | 5                                   | 3                                   |
|              | T673F     | The number of flowering     | 0                                   | 1                                   |
|              |           | The number of bud           | 2                                   | 5                                   |
|              |           | The number of non-flowering | 6                                   | 2                                   |
| Repetition 2 | Control   | The number of flowering     | 0                                   | 0                                   |
|              |           | The number of bud           | 0                                   | 0                                   |
|              |           | The number of non-flowering | 8                                   | 8                                   |
|              | T673      | The number of flowering     | 0                                   | 4                                   |
|              |           | The number of bud           | 5                                   | 3                                   |
|              |           | The number of non-flowering | 3                                   | 1                                   |
|              | T673F     | The number of flowering     | 0                                   | 0                                   |
|              |           | The number of bud           | 2                                   | 3                                   |
|              |           | The number of non-flowering | 6                                   | 5                                   |
| Repetition 3 | Control   | The number of flowering     | 0                                   | 0                                   |

|  |       |                             |   |   |
|--|-------|-----------------------------|---|---|
|  |       | The number of bud           | 0 | 0 |
|  |       | The number of non-flowering | 8 | 8 |
|  | T673  | The number of flowering     | 0 | 3 |
|  |       | The number of bud           | 4 | 2 |
|  |       | The number of non-flowering | 4 | 3 |
|  | T673F | The number of flowering     | 0 | 0 |
|  |       | The number of bud           | 2 | 5 |
|  |       | The number of non-flowering | 6 | 3 |

G. The difference statistics analysis of control/T673/T673-F about flowering and buds.

| Condition                            | Control/T673 | Control/T673-F | T673/T673F |
|--------------------------------------|--------------|----------------|------------|
| The number of flowering and buds     | 0.0020187    | 0.0100597      | 0.4168655  |
| The number of non-flowering and buds | 0.0020187    | 0.0100597      | 0.4168655  |

**Table S12.** Statistical results of antagonistic experiment of strains T673 and T673-F against six pathogens.

| Pathogens                                  | Control group<br>pathogen colony radius<br>(mm) | Colony radius of pathogenic<br>after T673 treatment<br>(mm) | Inhibition rate of<br>strain T673 (%) | Colony radius of pathogenic<br>after T673-F treatment<br>(mm) | Inhibition rate of<br>strain T673-F (%) |
|--------------------------------------------|-------------------------------------------------|-------------------------------------------------------------|---------------------------------------|---------------------------------------------------------------|-----------------------------------------|
| <i>Alternaria solanacearum</i>             | 27.30                                           | 9.17                                                        | 67.54                                 | 10.25                                                         | 62.57                                   |
|                                            |                                                 | 8.90                                                        |                                       | 10.07                                                         |                                         |
|                                            | 30.55                                           | 10.04                                                       |                                       | 10.95                                                         |                                         |
|                                            |                                                 | 9.45                                                        |                                       | 12.04                                                         |                                         |
| <i>Fusarium oxysporum</i> f.sp.cucumerinum | 39.38                                           | 11.42                                                       | 69.19                                 | 12.85                                                         | 67.60                                   |
|                                            |                                                 | 13.38                                                       |                                       | 12.93                                                         |                                         |
|                                            | 39.85                                           | 12.16                                                       |                                       | 13.62                                                         |                                         |
|                                            |                                                 | 11.86                                                       |                                       | 11.94                                                         |                                         |
| <i>Botrytis cinerea</i>                    | 66.67                                           | 19.97                                                       | 74.44                                 | 18.41                                                         | 72.34                                   |
|                                            |                                                 | 18.85                                                       |                                       | 17.88                                                         |                                         |
|                                            | 69.05                                           | 14.64                                                       |                                       | 19.75                                                         |                                         |
|                                            |                                                 | 15.91                                                       |                                       | 19.10                                                         |                                         |
| <i>Fusarium pseudograminearum</i>          | 60.72                                           | 16.64                                                       | 71.14                                 | 18.36                                                         | 70.28                                   |
|                                            |                                                 | 18.21                                                       |                                       | 18.75                                                         |                                         |
|                                            | 58.54                                           | 16.62                                                       |                                       | 16.66                                                         |                                         |
|                                            |                                                 | 17.37                                                       |                                       | 17.12                                                         |                                         |
| <i>Phytophthora capsici</i>                | 41.91                                           | 11.41                                                       | 70.67                                 | 13.02                                                         | 69.07                                   |
|                                            |                                                 | 11.38                                                       |                                       | 12.78                                                         |                                         |
|                                            | 41.52                                           | 13.47                                                       |                                       | 12.87                                                         |                                         |
|                                            |                                                 | 12.68                                                       |                                       | 12.94                                                         |                                         |
| <i>Rhizoctonia solani</i>                  | 31.27                                           | 7.46                                                        | 70.77                                 | 7.35                                                          | 70.91                                   |
|                                            |                                                 | 7.97                                                        |                                       | 8.66                                                          |                                         |
|                                            | 30.25                                           | 11.07                                                       |                                       | 9.04                                                          |                                         |
|                                            |                                                 | 9.47                                                        |                                       | 10.75                                                         |                                         |

Table S13. Situation of cucumber planted in the glass tube for resistance to *F. oxysporum* f.sp.*cucumerinum* (FOC) treated by control, FOC, T673+FOC and T673-F+FOC respectively on the 13<sup>th</sup> day.

A. Disease levels of cucumber root rot disease infected by *FOC* on the 13th day

| Disease level | Symptom description                                        |
|---------------|------------------------------------------------------------|
| Level 0       | No symptoms                                                |
| Level 1       | The leaves do not wither and turn slightly yellow          |
| Level 2       | The leaves wither and the roots shrink slightly            |
| Level 3       | All the leaves withered, the roots turned brown and shrank |
| Level 4       | The plant withered and died                                |

B. Disease levels of cucumber infected by *FOC* on the 13th day

| The 13 <sup>th</sup> day |              |            |            |            |            |              |            |            |            |            |              |            |            |            |            |
|--------------------------|--------------|------------|------------|------------|------------|--------------|------------|------------|------------|------------|--------------|------------|------------|------------|------------|
|                          | Repetition 1 |            |            |            |            | Repetition 2 |            |            |            |            | Repetition 3 |            |            |            |            |
| Disease level            | Level<br>0   | Level<br>1 | Level<br>2 | Level<br>3 | Level<br>4 | Level<br>0   | Level<br>1 | Level<br>2 | Level<br>3 | Level<br>4 | Level<br>0   | Level<br>1 | Level<br>2 | Level<br>3 | Level<br>4 |
| CK1                      | 8            |            |            |            |            | 8            |            |            |            |            | 8            |            |            |            |            |
| <i>FOC</i>               |              |            |            |            | 8          |              |            |            |            | 8          |              |            |            |            | 8          |
| <i>FOC</i> +T673         |              |            | 3          |            | 5          |              |            | 3          |            | 5          |              |            | 2          |            | 6          |
| <i>FOC</i> +T673-F       |              |            | 2          |            | 6          |              |            | 1          |            | 7          |              |            | 1          |            | 7          |

C. Disease index of the treatments of cucumber infected by *FOC* on the 13th day

| Treatment          | Disease index on the 13th day |              |              |         |
|--------------------|-------------------------------|--------------|--------------|---------|
|                    | Repetition 1                  | Repetition 2 | Repetition 3 | Everage |
| <i>FOC</i>         | 100                           | 100          | 100          | 100     |
| <i>FOC</i> +T673   | 81.25                         | 81.25        | 87.5         | 83.33   |
| <i>FOC</i> +T673-F | 87.5                          | 93.75        | 93.75        | 91.67   |
